# Supplementary material for: Density-dependent natural selection mediates harvest-induced trait changes
Source: bioRxiv or medRxiv preprint supplement (doi:10.1101/561522), 2020-08-10
Supplement: Supplementary file [file media-1.pdf]

# Supplementary Information for

## Density-dependent natural selection mediates harvest-induced trait changes

Alix Bouffet-Halle, Jacques Mériguet, David Carmignac, Simon Agostini, Alexis Millot,  
Samuel Perret, Eric Motard, Beatriz Decenciere, Eric Edeline\*

\* Corresponding author: [eric.edeline@inrae.fr](mailto:eric.edeline@inrae.fr)

### **This PDF file includes:**

SI Appendix I: Supplementary Methods.

SI Appendix II: Natural selection on body size in medaka.

SI Appendix III: Supplementary Results:

- Table S1: Inference of number of age classes in pond medaka populations.
- Table S2: Structure and MCMC parameter estimates for models 4-6 and 8.
- Table S3: Effect of medaka fishing on medaka food in ponds.
- Table S4: Analysis of deviance.
- Fig. S1: Experimental design.
- Fig. S2: Random effects of breeding pairs on their progeny's somatic growth rate and maturation probability.

## **APPENDIX I. SUPPLEMENTARY METHODS**

### **Origin of the experimental medaka populations**

Our start medaka populations descended from 100 parents wild-caught in Kiyosu (Toyohashi, Aichi Prefecture, Japan) in June 2011. These 100 breeders were brought to the Centre de Recherche en Ecologie Expérimentale et Prédictive near Paris, France (CEREEP – ECOTRON Île-de-France, [www.cereep.ens.fr](http://www.cereep.ens.fr)), and maintained in groups of 20 individuals in five 20 L aquariums where they mated randomly. Eggs were collected from July to September 2011 and incubated in Petri dishes. Hatched larvae were randomly assigned to 12 circular outdoor ponds (3.57 m diameter, 1.2 m deep) at a density of about 160 larvae per pond which, we assumed, was sufficient to prevent founder effects.

Prior to medaka introduction, the 12 ponds were bottom-coated with a 5 cm layer of Loire River sand, filled with tap water and mildly enriched with a plant fertilizer. After a few weeks of algal

development, tanks were seeded with a diverse community of zooplankton collected from surrounding  
36 water bodies. Medaka introduction was performed after ponds had reached a clear-water state  
indicating algal control by zooplankton. After introduction, two pairs of floating plastic brushes were  
38 placed in each tank to provide fish with a spawning substrate and shelter for larvae. Afterwards, ponds  
received only rain water and aerial deposits. Each pond was covered with a net to prevent avian  
40 predation, and outlets were secured with a stainless steel filter to prevent any fish or egg escapement.

### 42 **Monitoring medaka food in ponds**

In 2012, we measured the effect of medaka fishing in March on zooplankton and filamentous algae,  
44 which are primary food sources for medaka in ponds, during the following months. In each pond on 11  
dates (April 11<sup>th</sup> and 27<sup>th</sup>, May 9<sup>th</sup> and 23<sup>rd</sup>, June 6<sup>th</sup> and 13<sup>th</sup>, July 4<sup>th</sup> and 18<sup>th</sup>, August 22<sup>nd</sup> and  
46 September 18<sup>th</sup>), zooplankton was sampled from twelve, 2 L water-column samples homogeneously  
spread across the pond. The resultant 24 L were filtered on a 50 µm filter and the retained zooplankton  
48 were fixed in 99% ethanol before subsequent enumeration of rotifers (*Asplanchna* sp. vs. other  
rotifers), Copepod *nauplii*, copepodite stages of calanoid and cyclopid Copepods, and Cladocerans  
50 using either a binocular microscope, the ZooScan (Gorsky *et al.* 2010) or the FlowCam (Sieracki *et al.*  
1998). Percentage of pond surface covered by filamentous algae was visually estimated by multiple  
52 observers on 5 dates in 2012 (May 9<sup>th</sup>, September 18<sup>th</sup> and 24<sup>th</sup>, October 9<sup>th</sup> and 23<sup>rd</sup>) and 2 dates in  
2013 (May 22<sup>nd</sup> and July 12<sup>th</sup>).

### 54 **Feeding of F<sub>1</sub> progeny in the laboratory**

56 In the low-food environment, medaka were fed once every second day with 2 mL of a solution  
containing *nauplii* of *Artemia salina* (INVE Aquaculture SEP-Art cysts) providing  $8.2 \pm 0.7$  (mean  $\pm$   
58 SD) mg dry weight of *nauplii* (assuming a 40% dry weight yield from cysts from INVE technical  
sheets), alternated with dry food (Skretting Gemma Micro, see below). In the high-food environment,

60 medaka were fed twice daily, once with *nauplii* and once with dry food. In the medium-food  
 environment, medaka were fed once daily alternating *nauplii* and dry food.

62

Dry food doses (measured with volumetric spoons) and pellet sizes were adjusted during fish  
 64 development to fit with the ontogenetic increase in energy needs and prey size. We computed  
 theoretical daily needs in dry food mass per fish as  $M(a) \times 0.30 (M(a)/M_b)^{-0.25}$ , where  $M(a)$  is  
 66 individual fish body mass at age  $a$  (as estimated from previous laboratory data on mass-age relationship  
 in Renneville et al. 2020),  $M_b$  is individual fish body mass at birth, and the -0.25 exponent follows  
 68 from the metabolic theory of ecology (Brown et al. 2004). To roughly follow these theoretical needs,  
 medaka received daily 2, 3 and 7 mg of dry food from ages 0 to 40, 40 to 60, and 60 days-post-hatch  
 70 (dph) onwards, respectively. Pellet size ( $\mu\text{m}$ ) was 100% 150, 50% mixture of 150-300 and 100% 300  
 from ages 0 to 20, 20 to 40, and 40 dph onwards, respectively.

72

### Statistical analyses

#### 74 *Fishery selection in ponds*

We estimated the relationship between individual standard body length and probability to survive  
 76 through the fishery using a Bernoulli GLMM with a logit link function:

$$\begin{aligned}
 & y_i \sim B(p_i) \\
 & \ln\left(\frac{p_i}{1-p_i}\right) = \alpha_0 + \alpha_{k[i]} + (\beta_0 + \beta_{k[i]}) Sdl_i \quad (2), \\
 & \begin{pmatrix} \alpha_k \\ \beta_k \end{pmatrix} \sim N\left(\begin{pmatrix} 0 \\ 0 \end{pmatrix}, \begin{pmatrix} \sigma_\alpha & \rho\sigma_\alpha\sigma_\beta \\ \rho\sigma_\beta\sigma_\alpha & \sigma_\beta \end{pmatrix}\right)
 \end{aligned}$$

80 where  $B$  is the Bernoulli distribution, subscripts  $i$  and  $k$  index individuals ( $n = 3970$ ) and  
 sampling events, respectively, to which individuals belong, and  $\ln$  is the natural logarithm. There

82 were  $n = 6$  fished populations and  $n = 5$  sampling years, yielding  $k = 1, 2, \dots, 30$  sampling events. Eq.  
2 indicates that we modelled the intercept and slope of the survival-length relationship as normally-  
84 varying among sampling events  $k$ , including a correlation parameter  $\rho$  between intercept and  
slope. Parameter estimates  $\alpha_0$  and  $\beta_0$  from Eq. 2 define a mean size-dependent survival function  
86 as plotted in Fig. 3a in the main text.

### 88 *Medaka aging and population dynamics in ponds*

Medaka juveniles are too small to be tagged and, unlike in Japan (Terao 1985; Edeline *et al.* 2016), no  
90 winter check was deposited in medaka otoliths in our experimental populations. We therefore relied on  
an analysis of body length-frequency distributions to infer medaka age using model-based clustering in  
92 the `mclust` R package (Scrucca *et al.* 2016). Medaka longevity ranges from one year in the wild in  
Japan to five years in the laboratory (Edeline *et al.* 2016 and references therein). Therefore, we allowed  
94 for one to five Gaussian component models and further allowed for different variances between the  
Gaussian components. Then, we selected the optimal model and corresponding number of Gaussian  
96 components according to Bayesian Information Criterion, as returned by the `mclustBIC` function (the  
optimal model was that yielding the highest BIC value).

98

We estimated medaka population dynamics in ponds through their stock-recruitment relationship,  
100 where stock is the total number of fish in March (i.e., number of age 0+ and 1+ individuals) and  
recruitment is the number of age 0+ individuals in Autumn of the same year. To estimate recruitment,  
102 we fitted a mixture of two Gaussian distributions to individual standard body lengths  $S_{dl}$  :

104

$$\begin{aligned}
Sdl_i &\sim \sum_{j=1}^J \sum_{k=1}^K \pi_{j,k} N(\mu_{j,k}, \sigma_j^2) \\
\mu_{2,k} &\sim N(\mu_{H[k]}, \sigma^2) \\
\mu_{1,k} &= \delta_k \mu_{2,k} \\
\delta_k &\sim U(0,1)
\end{aligned} \tag{1a},$$

106 where  $i$  indexes individuals ( $n = 17908$ ),  $j$  indexes age groups (age 0+ vs. 1+ such that  $J = 2$ ),  
 $k$  indexes a sampling event, i.e., indexes one population in a particular year and month ( $K = 109$   
108 sampling events),  $N$  is the normal distribution, and  $U$  is the uniform distribution.  $H[k]$  indexes  
the harvest treatment (harvested vs. non harvested) associated with sampling event  $k$ .  $\pi_{j,k}$  is the  
110 proportion of age  $j$  individuals at each sampling event  $k$  such as for each  $k$  :

112

$$\pi_j \geq 0, \sum_{j=1}^J \pi_j = 1 \tag{1b}.$$

114 Indexes in line 1 in Eq. 1a show that our model estimated a mean standard body length separately for  
each age group at each sampling event, while body length variance was assumed to vary only with age.  
116 Line 2 in Eq. 1a shows that we assumed the mean standard body length at age 1+ at each sampling  
event,  $\mu_{2,k}$ , to be a normally-distributed random variable with higher-hierarchical mean specific to  
118 each harvest treatment, because harvesting was expected to restrict the maximum body size of medaka.  
Lines 3-4 in Eq. 1a show that mean standard body length of age 0+ medaka at each sampling event,  
120  $\mu_{1,k}$ , was estimated as proportional to  $\mu_{2,k}$  with a proportionality constant  $\delta_k$  following a  
uniform distribution between 0 and 1. Model 1 provided us with MCMC (see below) age samples for  
122 each individual fish in the dataset, allowing us to compute age-specific exploitation rates by the fishery  
that were on average 58% (95% credible interval 34-72 %) on age 0+ juveniles, and 96 % (95%  
124 credible interval 92-98 %) on age 1+ adults.

126 Model (1) above allowed us to estimate the absolute number  $R_k$  of age 0+ medaka recruits at each  
 127 November sampling event  $k$  ( $n = 60$  November sampling events). We then visualized the strength of  
 128 negative density-dependence in pond medaka populations by plotting (Fig. 3b in the main text) Ricker  
 “stock-recruitment” relationships between  $R_k$  and the number  $S_k$  of fish released in March (stock  
 130 of spawners):

$$132 \quad R_k \sim P(\lambda_k) \quad (3),$$

$$\ln(\lambda_k) = \ln(S_k) + \alpha_{Year[k]} + \beta_{Year[k]} S_k$$

134 where  $P$  is the Poisson distribution and  $Year[k]$  indexes indicate that one Ricker curve was fitted  
 for each year from 2012 to 2016.

136

#### *Larvae counts*

138 Larvae counts  $L$  were highly overdispersed and followed a zero-inflated negative binomial  
 distribution, which we modelled as (Ntzoufras 2009):

140

$$L_i \sim NB(\phi_i, r_{H[i]})$$

$$\phi_i = \frac{r_{H[i]}}{r_{H[i]} + \lambda_i(1 - \theta_i)} \quad (4a),$$

$$\ln(\lambda_i) = \alpha_{k[i]} + \beta_{H[i]} + \gamma_{H[i]} Day_i + \delta_{H[i]} Day_i^2$$

$$\alpha_{k[i]} \sim N(0, \sigma_\alpha^2)$$

142

where  $NB$  is the negative binomial distribution with success probability  $\phi$  and number of failures  
 144  $r$ , and subscript  $i$  indexes counts from a given observer in a given population on a given sampling  
 day ( $n = 2004$  counts). Lines 3 and 4 in Eq. (4a) show that we modelled positive (non-zero) counts  $\lambda$

146 as a harvest treatment-specific, 2<sup>nd</sup> order polynomial of the day of year (scaled to 0 mean), with a  
normally-distributed random effect of  $k$  corresponding, as above, to a given population in a given  
148 year ( $n = 36$ ).

150 The  $\theta$  latent variable for absence of larvae was modelled as a Bernoulli process being a 2<sup>nd</sup> order  
polynomial of the day of year :

152

$$\begin{aligned} \theta_i &\sim B(\psi_i) \\ \ln\left(\frac{\psi_i}{1-\psi_i}\right) &= \epsilon + \zeta \text{Day}_i + \eta \text{Day}_i^2 \quad (4b), \end{aligned}$$

154 where  $B$  is the Bernoulli distribution with probability of larvae absence  $\psi$  .

156 Line 2 in Eq. 4a shows that we allowed for the  $r$  parameter, which enters in the computation of the  
variance of the distribution (Ntzoufras 2009), to be different among the two harvest treatments  $H$  .

158 Harvest treatment-specific mean larvae count is given by  $E(L_H) = \bar{\lambda}_H(1 - \bar{\theta})$  and variance by  
 $var(L_H) = \bar{\lambda}_H(1 - \bar{\theta})(\bar{\lambda}_H(1 - \bar{\theta}) + r_H)$  . In Table S1, we computed the dispersion index in each harvest

160 treatment as  $DI_H = E(L_H) / var(L_H)$  (Ntzoufras 2009).

## 162 *Zooplankton and filamentous algae in ponds*

We estimated the effect of medaka fishing on zooplankton abundances ( $n = 960$  observations) using a  
164 zero-inflated negative binomial GLMM (e.g., model 4 described above). The linear predictor was the  
same for both positive counts and the latent variable for absence, and included as fixed effects a  
166 medaka fishing-by-zooplankton taxon interaction ( $n = 2*6 = 12$  levels), and as normally-distributed  
random intercepts the pond ( $n = 12$  levels), sampling date ( $n = 11$  levels), and enumeration method ( $n =$   
168 3 levels). We estimated an effect of medaka fishing on % of pond covered by filamentous algae ( $n =$

234 observations) using a negative binomial GLMM that included as fixed effect medaka fishing ( $n = 2$   
170 levels) and as random intercepts the pond ( $n = 12$  levels), sampling date ( $n = 7$  levels) and the observer  
( $n = 9$  levels).

172 *Somatic growth rates and trajectories of  $F_1$  progeny in the laboratory*

174 We estimated harvest-by-food interactions on medaka growth trajectories using a 2<sup>nd</sup> order polynomial  
regression of standard body length  $Sdl$  on age (measured in days-post-hatch):

176

$$\begin{aligned} Sdl_i &\sim N(\mu_i, \sigma_i^2) \\ \mu_i &= \alpha_{P[i]} + \beta_{H[i]} + (\gamma_{H[i], F[i]} + \delta_{P[i]}) * Age_i + \eta Age_i^2 \\ \alpha_{P[i]} &\sim N(0, \sigma_\alpha^2) \\ \delta_{P[i]} &\sim N(0, \sigma_\delta^2) \\ \ln(\sigma_i^2) &= A_{H[i], F[i]} + B_{H[i], F[i]} Age_i \end{aligned} \quad (5),$$

178 where  $i$  indexes length observations ( $n = 1144$  observations from 104 individuals),  $H[i]$  indexes  
180 the harvest treatment associated with observation  $i$  ( $n = 2$  levels),  $H[i], F[i]$  indexes the  
interaction of harvest treatment and food environment ( $n = 2 * 3 = 6$  levels), and  $P[i]$  indexes the  
182 parental breeding pair associated with observation  $i$  ( $n = 36$  pairs), treated as a normally-distributed  
random effect on both size-at-hatch  $\alpha$  and the linear somatic growth rate  $\gamma$ . The six  $\gamma$   
184 parameters in Eq. 5 estimate the slope of the age effect on  $Sdl$  and provided somatic growth rates as  
plotted in Fig. 5a of the main text. The random pair effects on somatic growth rate,  $\delta_p$ , are shown in  
186 Fig. S2.

188 In this model, we assumed both linear somatic growth rate  $\gamma$  and the regression of (ln-transformed)  
residuals variance on age to be different among harvest treatments and food environments (lines 2 and



190 5 in Eq. 5, respectively). In contrast, size-at-hatch  $\beta_{H[i]}$  was allowed to vary only due to harvest treatment because food environments were applied only starting from 15 dph.

192

*Probabilistic maturation reaction norms of  $F_1$  progeny in the laboratory*

194 Probabilistic maturation reaction norms (PMRNs) describe the probability that an immature individual at a given age and size will mature during a given interval of time (Heino *et al.* 2002). Provided that  
196 plasticity in the maturation process is captured by growth trajectories, PMRNs separate the effects of evolution from plasticity on maturation. PMRNs have been extensively used to explore genetic effects  
198 of exploitation on the maturation process in wild populations (Olsen *et al.* 2004; Heino & Dieckmann 2008). We fitted a Bernoulli model to individual medaka maturity (0 or 1) data  $y_i$ , truncated so as to  
200 keep only the first maturity event for each individual (Heino & Dieckmann 2008):

$$\begin{aligned} y_i &\sim B(M_i) \\ \ln\left(\frac{M_i}{1-M_i}\right) &= \alpha_{P[i]} + \beta_{H[i]} + \gamma_{H[i]} \text{Age}_i + \delta_{H[i]} \text{Sdl}_i \quad (6), \\ \alpha_{P[i]} &\sim N(0, \sigma_\alpha^2) \end{aligned}$$

204 where  $M$  is maturity probability. Other subscripts or variables are as described in Eq. 5. The random pair effects on maturation probability at an average age and length,  $\alpha_p$ , shown in Fig. S2.

206

*Maturation rates of  $F_1$  progeny in the laboratory*

208 Technically, the PMRN approach assumes that observations are made at regular time intervals and, biologically, PMRNs assume that maturation is a discrete event. In the reality, however, observations  
210 are often made at irregular intervals (e.g., we observed medaka at intervals ranging from 6 to 17 days, 10 days on average), and maturation is often the threshold phenotypic expression of a continuous

212 physiological process (Harney et al. 2013 and references therein). To bypass these problems,  
 maturation rate models were developed that are not sensitive to the periodicity of observations and can  
 214 more finely capture the physiological dynamics that underlie maturation (Van Dooren *et al.* 2005).  
 Harney et al. (2013) have shown that maturation rate models may be approximated by fitting  
 216 maturation data to standard GLMs:

$$\begin{aligned}
 & y_i \sim B(M_i) \\
 218 \quad & \ln\left(\frac{M_i}{1-M_i}\right) = \ln(\Delta_i) + \alpha_{P[i]} + \beta_{H[i],F[i]} + \gamma \text{Age}_i + \delta \text{Sdl}_i \quad (7), \\
 & \alpha_{P[i]} \sim N(0, \sigma_\alpha^2)
 \end{aligned}$$

220 where subscripts are similar to that described in Eq. 6, and the duration interval (days) between two  
 observations  $\Delta$  is included as an offset term. We used this approach to estimate harvest-by-food  
 222 interaction on medaka maturation rates, in complement with the PMRN approach described above. The  
 parameter  $\beta$  captures maturation rates (in logit of maturation probability day<sup>-1</sup>), as plotted in Fig. 5b  
 224 in the main text.

## 226 *Predatory behaviour of F<sub>1</sub> progeny in the laboratory*

Counts  $C_i$  of number of prey eaten by individual medaka followed a zero-inflated negative binomial  
 228 distribution and were modelled similarly to larvae counts in model 4 above:

$$\begin{aligned}
 & C_i \sim NB(\phi_i, r_{H[i],F[i]}) \\
 230 \quad & \phi_i = \frac{r_{H[i],F[i]}}{r_{H[i],F[i]} + \lambda_i(1-\theta_i)} \quad (8a), \\
 & \ln(\lambda_i) = \alpha_{I[i]} + \beta_{H[i],F[i]} \\
 & \alpha_{I[i]} \sim N(0, \sigma_\alpha^2)
 \end{aligned}$$

232 where number of failures  $r$  and positive (non-zero) counts  $\lambda$  were both modelled as being different  
among harvest treatments  $H$  in each food environment  $F$ , while  $\alpha_{I[i]}$  was a normally-distributed  
234 random individual effect on  $\lambda$  ( $n = 104$  individuals). The  $\theta$  latent variable was modelled as:

$$\begin{aligned}
& \theta_i \sim B(\psi_i) \\
236 \quad & \ln\left(\frac{\psi_i}{1-\psi_i}\right) = \gamma + \delta_{I[i]} \quad (8b), \\
& \delta_{I[i]} \sim N(0, \sigma_\delta^2)
\end{aligned}$$

where  $\delta_I$  is a normally-distributed random individual effect.

238

#### *Analysis of deviance*

240 We tested for the overall statistical significance of harvest-by-food interactions on somatic growth and  
maturation in the laboratory using analyses of deviance. Specifically, we fitted the following models:

242

$$\begin{aligned}
& Sdl_i \sim N(\mu_i, \sigma^2) \\
& \mu_i = \alpha_{H[i]} + (\beta_{H[i]} + \gamma_{F[i]} + \delta_{H[i], F[i]}) Age_i + \epsilon Age_i^2 \quad (9), \text{ and}
\end{aligned}$$

244

$$\begin{aligned}
& y_i \sim B(M_i) \\
& \ln\left(\frac{M_i}{1-M_i}\right) = \alpha_{H[i]} + \beta_{F[i]} + \gamma_{H[i], F[i]} + (\delta_{H[i]} + \epsilon_{F[i]} + \zeta_{H[i], F[i]}) Age_i + (\eta_{H[i]} + \theta_{F[i]} + \nu_{H[i], F[i]}) Sdl_i \quad (10),
\end{aligned}$$

246

where variables and indexes are as in models (5) and (6).

248

#### *Parameter estimation*

250 Models 3, 9 and 10 were fitted using maximum likelihood (`glm` function, “quasibinomial”  
distribution for Eq. 10) in R 3.6.1 (R Core Team 2019). Analysis of deviance for models 9 and 10 was  
252 performed with the `anova` function using an F test to evaluate the significance of each predictor

separately (Table S3). Models for the abundance of zooplankton and for % of pond covered by  
254 filamentous algae were fitted by maximum likelihood using the `glmmTMB` library of the R software  
(Brooks *et al.* 2017). Other models were fitted by Markov chain Monte Carlo (MCMC) in JAGS 4.2.0  
256 (Plummer 2003) through the `jagsUI` package (Kellner 2019). To ease model convergence and avoid  
slope-intercept correlations, all numerical predictors were scaled to zero mean and, in case of Bernoulli  
258 distributions with logit links, further standardized to 0.5 standard deviation (Gelman *et al.* 2008). For  
each model, we ran three independent MCMC chains thinned at a period of 5 iterations until parameter  
260 convergence was reached, as assessed using the Gelman–Rubin statistic (Gelman & Rubin 1992).

262 Parameter estimates for models 4-6 and 8 are provided in Table S2. Statistical significance of harvest-  
and food-treatment effects reported in the main text was assessed from the posterior distributions of  
264 parameter differences in a test equivalent to a bilateral *t* test. In these tests, the MCMC P-value was  
twice the proportion of the posterior for which the sign was opposite to that of the mean posterior  
266 value. Priors were chosen to be weakly informative. In model 1 we used a Dirichlet prior for  $\pi_{j,k}$  and  
prevented label switching by assigning age class 0+ to fish shorter than 8 mm and age class 1+ and  
268 older to fish longer than 35 mm (Chung *et al.* 2004).

270 We assessed goodness of fit of our models by using a Bayesian P-value (Gelman *et al.* 1996). Briefly,  
we computed residuals for the actual data as well as for synthetic data simulated from estimated model  
272 parameters (i.e., residuals from fitting the model to “ideal” data). The Bayesian P-value is the  
proportion of simulations in which ideal residuals are larger than true residuals. If the model fits the  
274 data well, the Bayesian P-value is close to 0.5. Bayesian P values for our models ranged from 0.47 to  
0.57 and were on average 0.51, indicating excellent model fit to the data.

276

## APPENDIX II. NATURAL SELECTION ON BODY SIZE IN MEDAKA

278 We suggest that natural selection favoured small-bodied medaka in the wild, but large-bodied medaka  
in ponds. In the wild, medaka starve to death during their first reproductive bout while reaching age 1+,  
280 suggesting that small-bodied juvenile medaka exclude their large-bodied parents in exploitative  
competition for food (Edeline *et al.* 2016 and references therein). This is presumably because the  
282 complex habitat structure and relatively low population densities that prevail in the wild reduce  
interference and make competition to operate mainly through food exploitation, in which case a small  
284 body size provides fish with a strong competitive advantage (Persson *et al.* 1998; Persson & De Roos  
2006). This natural selection regime in the wild was shifted in our experimental ponds, where  
286 overcompensating stock-recruitment curves mediated by increased juvenile mortality demonstrate that  
large-bodied adults dominated small-bodied juveniles. Compared to the wild, ponds had drastically  
288 reduced habitat complexity and probably also higher population densities. These environmental  
changes likely shifted competition to operate mainly through interference, which was shown to favour  
290 larger body sizes in multiple systems (Post *et al.* 1999; Calsbeek & Smith 2007; Reichstein *et al.* 2013;  
Le Bourlot *et al.* 2014). In fish, interference is often associated with cannibalism which also favours  
292 larger body sizes (Claessen *et al.* 2000, 2004).

294

298 **Table. S1. Inference of number of age classes in pond medaka populations from body length**  
**distributions using model-based clustering.** Models including one to five Gaussian components were  
fitted to body-lengths separately for each year and harvest treatment. The optimal number of Gaussian  
300 components was that corresponding to the model returning the highest BIC (Scrucca *et al.* 2016).

302

| Harvest treatment | Year | Optimal number of Gaussian components |
|-------------------|------|---------------------------------------|
| Harvested         | 2012 | 2                                     |
|                   | 2013 | 2                                     |
|                   | 2014 | 2                                     |
|                   | 2015 | 1                                     |
|                   | 2016 | 2                                     |
| Unharvested       | 2012 | 2                                     |
|                   | 2013 | 2                                     |
|                   | 2014 | 2                                     |
|                   | 2015 | 2                                     |
|                   | 2016 | 2                                     |

**Table S2. Structure and MCMC parameter estimates for models 4-6 and 8.** The MCMC P-value is

twice the proportion of the posterior for which the sign was opposite to that of the mean posterior value. MCMC P-values are not relevant for variance parameters that are constrained to be non-zero.

306

| Response                                              | N      | Distribution              | Link  | Effect                             | Mean estimate | SD of the estimate | MCMC P-value |
|-------------------------------------------------------|--------|---------------------------|-------|------------------------------------|---------------|--------------------|--------------|
| Larvae count                                          | 2004   | Bernoulli in ZINB         | logit | Int.                               | -8.254        | 1.385              | 0.000        |
|                                                       |        |                           |       | Slope of day                       | -6.703        | 1.008              | 0.000        |
|                                                       |        |                           |       | Slope of day squared               | 10.356        | 1.800              | 0.000        |
|                                                       |        | Negative binomial in ZINB | In    | Int. no-harvest                    | 2.167         | 0.250              | 0.000        |
|                                                       |        |                           |       | Int. harvest                       | 1.250         | 0.251              | 0.000        |
|                                                       |        |                           |       | Slope of day no-harvest            | 0.292         | 0.080              | 0.000        |
|                                                       |        |                           |       | Slope of day harvest               | 2.211         | 0.141              | 0.000        |
|                                                       |        |                           |       | Slope of day squared no-harvest    | -0.472        | 0.127              | 0.000        |
|                                                       |        |                           |       | Slope of day squared harvest       | -1.638        | 0.182              | 0.000        |
|                                                       |        |                           |       | Dispersion index no-harvest        | 5.372         | 1.125              |              |
|                                                       |        |                           |       | Dispersion index harvest           | 3.996         | 0.780              |              |
|                                                       |        |                           |       | SD of year by pond effect (random) | 0.977         | 0.133              |              |
|                                                       |        |                           |       | Int. no-harvest                    | 4.410         | 0.106              | 0.000        |
|                                                       |        |                           |       | Int. harvest                       | 4.548         | 0.099              | 0.000        |
|                                                       |        |                           |       | Slope of age no-harvest low food   | 0.224         | 0.005              | 0.000        |
| Slope of age harvest low food                         | 0.210  | 0.005                     | 0.000 |                                    |               |                    |              |
| Slope of age no-harvest medium food                   | 0.250  | 0.005                     | 0.000 |                                    |               |                    |              |
| Slope of age harvest medium food                      | 0.231  | 0.005                     | 0.000 |                                    |               |                    |              |
| Slope of age no-harvest high food                     | 0.263  | 0.005                     | 0.000 |                                    |               |                    |              |
| Slope of age harvest high food                        | 0.248  | 0.004                     | 0.000 |                                    |               |                    |              |
| Slope of age squared                                  | -0.001 | 0.000                     | 0.000 |                                    |               |                    |              |
| Int. residual variance no-harvest low food            | -0.012 | 0.149                     | 0.921 |                                    |               |                    |              |
| Int. residual variance harvest low food               | -0.547 | 0.123                     | 0.000 |                                    |               |                    |              |
| Int. residual variance no-harvest medium food         | -0.605 | 0.149                     | 0.000 |                                    |               |                    |              |
| Int. residual variance harvest medium food            | -0.377 | 0.138                     | 0.007 |                                    |               |                    |              |
| Int. residual variance no-harvest high food           | -0.534 | 0.130                     | 0.001 |                                    |               |                    |              |
| Int. residual variance harvest high food              | -0.296 | 0.151                     | 0.063 |                                    |               |                    |              |
| Slope of age residual variance no-harvest low food    | -0.005 | 0.003                     | 0.063 |                                    |               |                    |              |
| Slope of age residual variance harvest low food       | 0.011  | 0.002                     | 0.000 |                                    |               |                    |              |
| Slope of age residual variance no-harvest medium food | 0.000  | 0.003                     | 0.985 |                                    |               |                    |              |
| Slope of age residual variance harvest medium food    | 0.010  | 0.002                     | 0.000 |                                    |               |                    |              |
| Slope of age residual variance no-harvest high food   | 0.011  | 0.002                     | 0.000 |                                    |               |                    |              |
| Slope of age residual variance harvest high food      | -0.011 | 0.003                     | 0.001 |                                    |               |                    |              |
| SD of parental pair effect on int. (random)           | 0.014  | 0.002                     |       |                                    |               |                    |              |
| SD of parental pair on slope of Age effect (random)   | 0.303  | 0.069                     |       |                                    |               |                    |              |

308 **Continues on the next page.**

310 **Table S2 continued.**

| Response               | N   | Distribution              | Link  | Effect                                      | Mean estimate | SD of the estimate | MCMC P-value |
|------------------------|-----|---------------------------|-------|---------------------------------------------|---------------|--------------------|--------------|
| Maturation probability | 591 | Bernoulli                 | logit | Int. no-harvest low food                    | -8.372        | 0.922              | 0.000        |
|                        |     |                           |       | Int. harvest low food                       | -6.477        | 0.723              | 0.000        |
|                        |     |                           |       | Int. no-harvest medium food                 | -6.009        | 0.685              | 0.000        |
|                        |     |                           |       | Int. harvest medium food                    | -5.905        | 0.626              | 0.000        |
|                        |     |                           |       | Int. no-harvest high food                   | -6.063        | 0.735              | 0.000        |
|                        |     |                           |       | Int. harvest high food                      | -6.544        | 0.676              | 0.000        |
|                        |     |                           |       | Slope of age                                | 1.554         | 0.908              | 0.090        |
|                        |     |                           |       | Slope of length                             | 7.247         | 1.164              | 0.000        |
|                        |     |                           |       | SD of parental pair effect on int. (random) | 1.469         | 0.355              |              |
| Prey count             | 311 | Bernoulli in ZINB         | logit | Int.                                        | -1.960        | 0.541              | 0.000        |
|                        |     |                           |       | SD of individual effect (random)            | 0.903         | 0.534              |              |
|                        |     | Negative binomial in ZINB | ln    | Int. no-harvest, low food                   | 2.035         | 0.208              | 0.000        |
|                        |     |                           |       | Int. harvest, low food                      | 1.848         | 0.231              | 0.000        |
|                        |     |                           |       | Int. no-harvest, medium food                | 1.928         | 0.245              | 0.000        |
|                        |     |                           |       | Int. harvest, medium food                   | 0.986         | 0.286              | 0.001        |
|                        |     |                           |       | Int. no-harvest, high food                  | 0.357         | 0.270              | 0.188        |
|                        |     |                           |       | Int. harvest, high food                     | 0.672         | 0.309              | 0.025        |
|                        |     |                           |       | Dispersion index no-harvest, low food       | 2.388         | 0.722              |              |
|                        |     |                           |       | Dispersion index harvest, low food          | 5.994         | 2.141              |              |
|                        |     |                           |       | Dispersion index no-harvest, medium food    | 6.509         | 3.857              |              |
|                        |     |                           |       | Dispersion index harvest, medium food       | 5.012         | 2.357              |              |
|                        |     |                           |       | Dispersion index no-harvest, high food      | 2.033         | 0.710              |              |
|                        |     |                           |       | Dispersion index harvest, high food         | 5.708         | 2.642              |              |
|                        |     |                           |       | SD of individual effect (random)            | 0.681         | 0.136              |              |



312 **Table S3. Effect of medaka fishing on medaka food in ponds.** Zooplankton abundances are counts  
 314 per liter and abundances of filamentous algae are % of pond surface covered. Predictions were obtained  
 316 from statistical models described in the SI Appendix I. There was a large variability in zooplankton  
 318 counts due to the effects of the pond, sampling date and enumeration method, and the positive effect of  
 320 medaka fishing was statistically significant on *Asplanchna* sp. (probability of presence,  $p = 0.033$ ),  
 copepodites of calanoids (non-zero abundances,  $p < 0.001$ ) and Cladocerans (non-zero abundances,  $p <$   
 $0.001$ ) before June but not after (results not shown), probably because of medaka recruitment that  
 increased medaka density in unharvested ponds. The effect of medaka fishing on filamentous algae was  
 statistically significant ( $p < 0.002$ ).

| Taxa                      | Medaka treatment | Predicted                                                                 |        |
|---------------------------|------------------|---------------------------------------------------------------------------|--------|
|                           |                  | Count / L (zooplankton) or<br>% pond surface cover<br>(filamentous algae) |        |
|                           |                  | Mean                                                                      | SE     |
| <i>Asplanchna</i> sp.     | Harvested        | 14.2                                                                      | 15.5   |
|                           | Unharvested      | 8.5                                                                       | 9.6    |
| Copepodites of calanoids  | Harvested        | 161.6                                                                     | 150.0  |
|                           | Unharvested      | 85.2                                                                      | 79.1   |
| Cladocerans               | Harvested        | 51.4                                                                      | 48.1   |
|                           | Unharvested      | 18.1                                                                      | 17.1   |
| Copepodites of cyclopoids | Harvested        | 2.7                                                                       | 2.6    |
|                           | Unharvested      | 3.2                                                                       | 3.1    |
| Copepod <i>nauplii</i>    | Harvested        | 213.3                                                                     | 197.6  |
|                           | Unharvested      | 215.2                                                                     | 199.8  |
| Small rotifers            | Harvested        | 7018.9                                                                    | 6537.0 |
|                           | Unharvested      | 6939.2                                                                    | 6458.5 |
| Filamentous algae         | Harvested        | 18.5                                                                      | 11.5   |
|                           | Unharvested      | 1.3                                                                       | 0.8    |

332

334 **Table S4. Analysis of deviance for GLMs testing for the harvest-by-food interaction on life-**  
**history traits in laboratory-born F<sub>1</sub> medaka progeny.** The “Deviance” column gives the reduction in  
the residual deviance as each predictor is added in turn into the model. The P-values compare the  
336 reduction in deviance to the residual deviance in an F test.

| Trait                      | Distribution | Link     | Predictor               | Df  | Deviance | Resid. DF | Resid. Dev | F     | P-val   |
|----------------------------|--------------|----------|-------------------------|-----|----------|-----------|------------|-------|---------|
| Body length                | Gaussian     | Identity | Harvesting              | 1   | 163      | 1130      | 20588      | 155   | <0.0001 |
|                            |              |          | Food                    | 2   | 658      | 1128      | 19929      | 312   | <0.0001 |
|                            |              |          | Age                     | 1   | 18086    | 1127      | 1843       | 17124 | <0.0001 |
|                            |              |          | Age^2                   | 1   | 469      | 1126      | 1374       | 444   | <0.0001 |
|                            |              |          | Harvesting x Food       | 2   | 2        | 1124      | 1372       | 1     | 0.3282  |
|                            |              |          | Harvesting x Age        | 1   | 22       | 1123      | 1350       | 21    | <0.0001 |
|                            |              |          | Food x Age              | 2   | 167      | 1121      | 1183       | 79    | <0.0001 |
|                            |              |          | Harvesting x Food x Age | 2   | 1        | 1119      | 1182       | 0     | 0.7160  |
| Maturation                 | Bernoulli    | Logit    | Harvesting              | 1   | 0        | 589       | 528        | 0     | 0.5758  |
|                            |              |          | Food                    | 2   | 6        | 587       | 522        | 6     | 0.0041  |
|                            |              |          | Age                     | 1   | 135      | 586       | 387        | 253   | <0.0001 |
|                            |              |          | Length                  | 1   | 57       | 585       | 329        | 107   | <0.0001 |
|                            |              |          | Harvesting x Food       | 2   | 7        | 583       | 323        | 6     | 0.0022  |
|                            |              |          | Harvesting x Age        | 1   | 3        | 582       | 320        | 5     | 0.0195  |
|                            |              |          | Food x Age              | 2   | 11       | 580       | 309        | 11    | <0.0001 |
|                            |              |          | Harvesting x Length     | 1   | 0        | 579       | 308        | 0     | 0.5630  |
|                            |              |          | Food x Length           | 2   | 2        | 577       | 307        | 2     | 0.2142  |
|                            |              |          | Harvesting x Food x Age | 2   | 15       | 575       | 292        | 14    | <0.0001 |
| Harvesting x Food x Length | 2            | 1        | 573                     | 290 | 1        | 0.3197    |            |       |         |

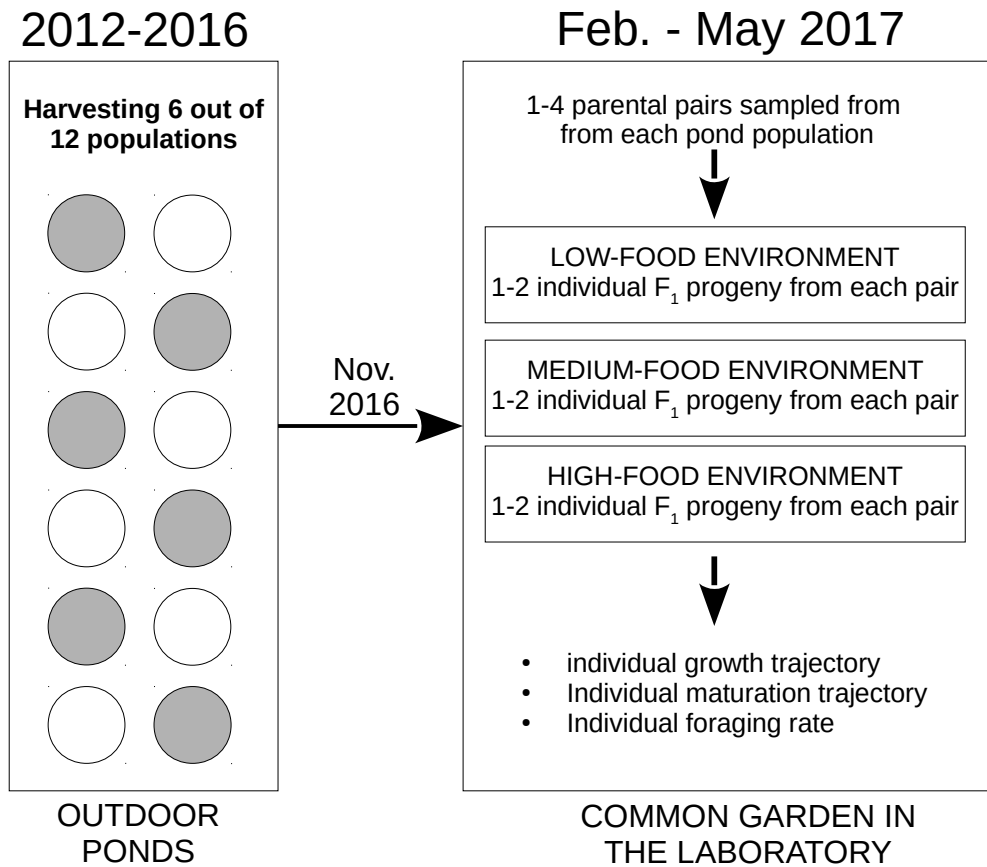

342 **Fig. S1. Experimental design.** In 2012, 12 independent populations of medaka were introduced in 12,  
 10 m<sup>2</sup> outdoor ponds and maintained naturally with no added food. Each year from 2012 to 2016, the  
 344 12 populations were sampled (98% catch rate) in March and November, and each fish was individually  
 weighed. Each year in March in six populations (shaded), only the 19% smallest-bodied individuals  
 346 from the catch were released, while all individuals were released in the other six populations  
 (unshaded). Each year in November, all fish were released after weighing, except in November 2016  
 348 when a random sample of 6-10 fish (mean 9.6) from each population was kept and transferred to the  
 laboratory to serve as parents in a common garden experiment. In 2017, parents originating from the  
 350 same population were mated and their progeny was distributed in individual tanks under three food  
 environments (Low, Medium, High), where we measured their individual somatic growth rate,  
 352 maturation trajectory, and foraging rate.

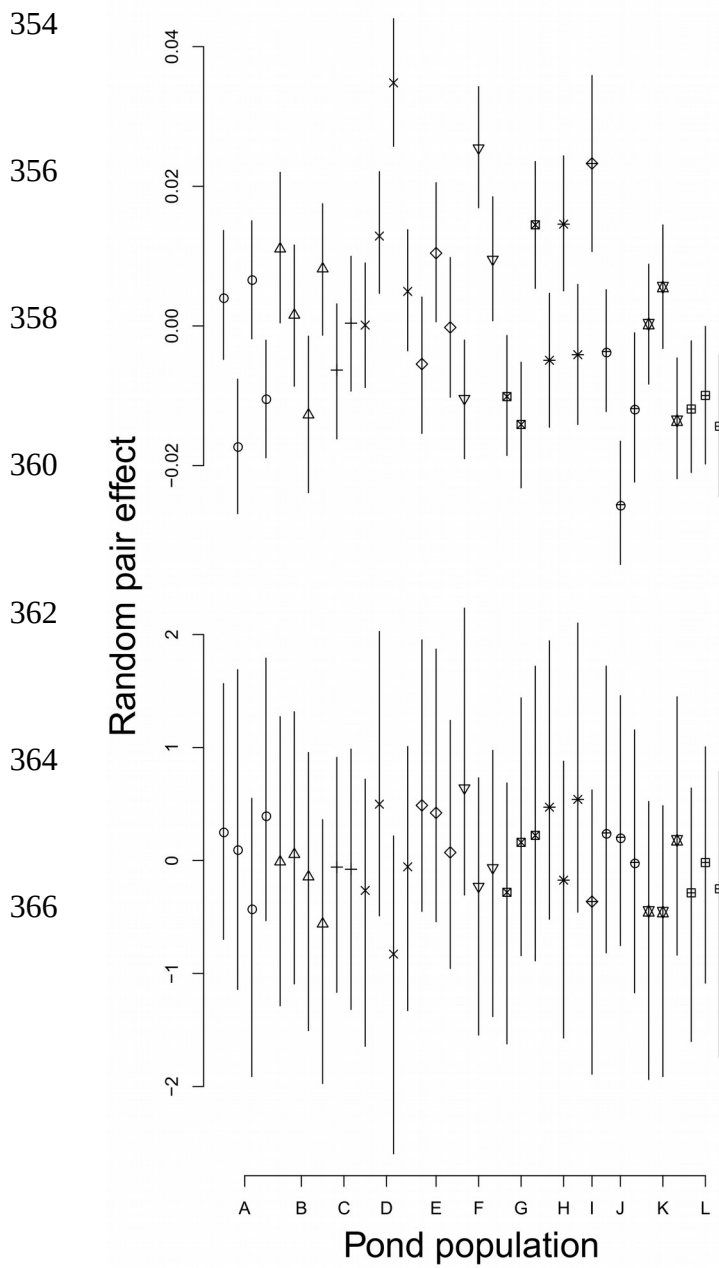

**Fig. S2. Random effects of breeding pairs on the somatic growth rate (top) and maturation probability (bottom) of F<sub>1</sub> medaka progeny in the laboratory.** Effects were estimated by MCMC from models 5 and 6, as described above. Points show median MCMC estimates with 95% credible intervals. Effects for somatic growth rate are in mm day<sup>-1</sup> and effects on maturation are in logit (probability). Symbols correspond to the pond population of origin (coded on the x axis from A to L). Populations A, D, F, G, J and K were harvested while other populations were unharvested.

### Supplementary References

- Brooks, M.E., Kristensen, K., Benthem, K.J. van, Magnusson, A., Berg, C.W., Nielsen, A., *et al.* (2017). glmmTMB balances speed and flexibility among packages for zero-inflated generalized linear mixed modeling. *R J.*, 9, 378–400.
- Brown, J.H., Gillooly, J.F., Allen, A.P., Savage, V.M. & West, G.B. (2004). Toward a metabolic theory of ecology. *Ecology*, 85, 1771–1789.
- Calsbeek, R. & Smith, T.B. (2007). Probing the adaptive landscape using experimental islands: density-dependent natural selection on lizard body size. *Evol. Int. J. Org. Evol.*, 61, 1052–1061.
- Chung, H., Loken, E. & Schafer, J.L. (2004). Difficulties in drawing inferences with finite-mixture models: a simple example with a simple solution. *Am. Stat.*, 58, 152–158.
- Claessen, D., de Roos, A.M. & Persson, L. (2000). Dwarfs and giants: cannibalism and competition in size structured populations. *Am. Nat.*, 155, 219–237.
- Claessen, D., de Roos, A.M. & Persson, L. (2004). Population dynamic theory of size-dependent cannibalism. *Proc. R. Soc. Lond. B Biol. Sci.*, 271, 333.
- Edeline, E., Terao, O. & Naruse, K. (2016). Empirical evidence for competition-driven semelparity in wild medaka. *Popul. Ecol.*, 58, 371–383.
- Gelman, A., Jakulin, A., Pittau, M.G. & Su, Y.-S. (2008). A weakly informative default prior distribution for logistic and other regression models. *Ann. Appl. Stat.*, 2, 1360–1383.
- Gelman, A., Meng, X.L. & Stern, H. (1996). Posterior predictive assessment of model fitness via realized discrepancies. *Stat. Sin.*, 6, 733–807.
- Gelman, A. & Rubin, D.B. (1992). Inference from iterative simulation using multiple sequences. *Stat. Sci.*, 457–472.

- Gorsky, G., Ohman, M.D., Picheral, M., Gasparini, S., Stemmann, L., Romagnan, J.-B., *et al.* (2010). Digital zooplankton image analysis using the ZooScan integrated system. *J. Plankton Res.*, 32, 285–303.
- Harney, E., Van Dooren, T.J.M., Paterson, S. & Plaistow, S.J. (2013). How to measure maturation: a comparison of probabilistic methods used to test for genotypic variation and plasticity in the decision to mature. *Evolution*, 67, 525–538.
- Heino, M. & Dieckmann, U. (2008). Detecting fisheries-induced life-history evolution: an overview of the reaction-norm approach. *Bull. Mar. Sci.*, 83, 69–93.
- Heino, M., Dieckmann, U. & Godø, O.R. (2002). Measuring probabilistic reaction norms for age and size at maturation. *Evolution*, 56, 669–678.
- Kellner, K. (2019). *jagsUI: a wrapper around “rjags” to streamline “JAGS” analyses.*
- Le Bourlot, V., Tully, T. & Claessen, D. (2014). Interference versus exploitative competition in the regulation of size-structured populations. *Am. Nat.*, 184, 609–623.
- Ntzoufras, I. (2009). *Bayesian modeling using WinBUGS*. 1st edn. Wiley, Hoboken (NJ).
- Olsen, E.M., Heino, M., Lilly, G.R., Morgan, M.J., Brattey, J., Ernande, B., *et al.* (2004). Maturation trends indicative of rapid evolution preceded the collapse of northern cod. *Nature*, 428, 932–935.
- Persson, L. & De Roos, A.M. (2006). Food-dependent individual growth and population dynamics in fishes. *J. Fish Biol.*, 69, 1–20.
- Persson, L., Leonardsson, K., de Roos, A.M., Gyllenberg, M. & Christensen, B. (1998). Ontogenetic scaling of foraging rates and the dynamics of a size-structured consumer-resource model. *Theor. Popul. Biol.*, 54, 270–293.
- Plummer, M. (2003). JAGS: a program for analysis of Bayesian graphical models using Gibbs sampling. Presented at the Proceedings of the 3rd international workshop on distributed statistical computing, Vienna, Austria.

- Post, J.R., Parkinson, E.A. & Johnston, N.T. (1999). Density-dependent processes in structured fish populations: interaction strengths in whole-lake experiments. *Ecol. Monogr.*, 69, 155–175.
- R Core Team. (2019). *R: a language and environment for statistical computing*. R Foundation for Statistical Computing, Vienna, Austria.
- Reichstein, B., Schröder, A., Persson, L. & De Roos, A.M. (2013). Habitat complexity does not promote coexistence in a size-structured intraguild predation system. *J. Anim. Ecol.*, 82, 55–63.
- Renneville, C., Millot, A., Agostini, S., Carmignac, D., Maugars, G., Dufour, S., *et al.* (in press). Unidirectional response to bidirectional selection on body size. I. Phenotypic, life history and endocrine response. *Ecol. Evol.*
- Scrucca, L., Fop, M., Murphy, T.B. & Raftery, A.E. (2016). mclust 5: clustering, classification and density estimation using Gaussian finite mixture models. *R J.*, 8, 289–317.
- Sieracki, C.K., Sieracki, M.E. & Yentsch, C.S. (1998). An imaging-in-flow system for automated analysis of marine microplankton. *Mar. Ecol. Prog. Ser.*, 168, 285–296.
- Terao, O. (1985). Contribution to the study of the ecology of the medaka, *Oryzias latipes*, under natural conditions: life span, reproduction, food habits and its seasonal changes. Master Thesis. Tokyo.
- Van Dooren, T.J.M., Tully, T. & Ferrière, R. (2005). The analysis of reaction norms for age and size at maturity using maturation rate models. *Evolution*, 59, 500–506.
